# Supplementary material for: Seasonal Variability and Risk Assessment of Atmospheric Polycyclic Aromatic Hydrocarbons and Hydroxylated Polycyclic Aromatic Hydrocarbons in Kanazawa, Japan
Source: MDPI journal article supplement (doi:10.3390/app12199469), 2022-09-21
Supplement: s1 [file s1]

Archive with 1 entries (1 files):
- applsci-1917748-supplementary.pdf
